# Supplementary material for: An armed oncolytic virus enhances the efficacy of tumor-infiltrating lymphocyte therapy by converting tumors to artificial antigen-presenting cells in situ
Source: PubMed Central journal article supplement (PMC9734027; doi:10.1016/j.ymthe.2022.06.010), 2022-06-17
Supplement: mmc1.pdf [file mmc1.pdf]

## Supplemental Information

### **An armed oncolytic virus enhances the efficacy of tumor-infiltrating lymphocyte therapy by converting tumors to artificial antigen-presenting cells *in situ***

**Kai Ye, Fan Li, Ruikun Wang, Tianyi Cen, Shiyu Liu, Zhuoqian Zhao, Ruonan Li, Lili Xu, Guanmeng Zhang, Zhaoyuan Xu, Li Deng, Lili Li, Wei Wang, Alexey Stepanov, Yajuan Wan, Yu Guo, Yuanke Li, Yuan Wang, Yujie Tian, Alexander G. Gabibov, Yingbin Yan, and Hongkai Zhang**

1 **Supplementary Figure 1**

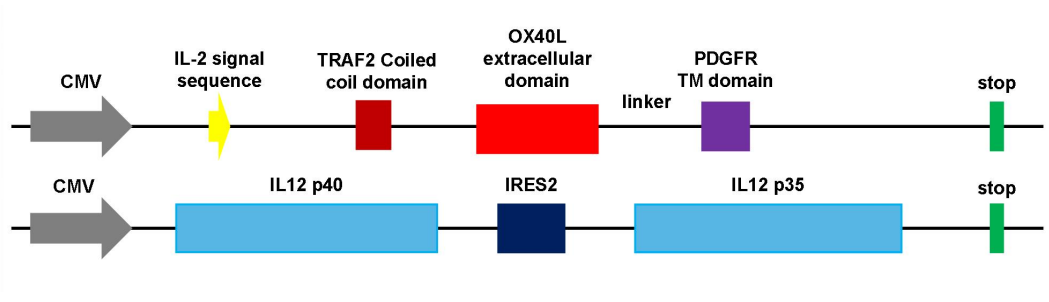

2

3 **Figure S1. Schematic representation of the trimerized OX40L and IL12**  
4 **design.**

5 The OX40L extracellular domain is fused to the coiled coil trimerization domain  
6 of the TRAF2 protein and the PDGFR transmembrane<sup>1</sup> (TM) domain. The IL12  
7 domain consists of IL12 p40 and IL12 p35, which are linked by internal  
8 ribosome entry site 2 (IRES2).

9

10

11

12

13

14

15

16

17

18

19

20

21

22

23

24

25

26

27

28

29

30

31

32 **Supplementary Figure 2**

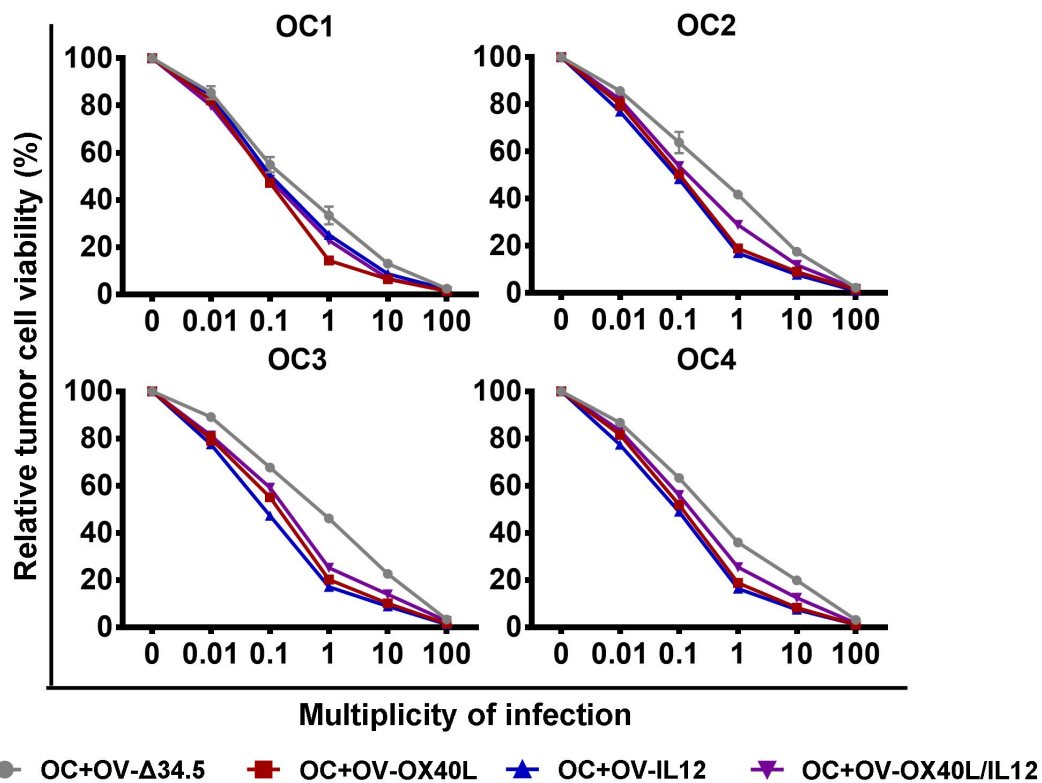

33

34 **Figure S2. Susceptibility of primary cancer cells to different modified**  
35 **OVs.**

36 Primary oral cancer cells from 4 patients were infected with the indicated OVs  
37 at different MOIs. Cell viability was determined at 48 h after infection by using  
38 the MTT assay (n=3).

39

40

41

42

43

44

45

46

47

48

49

50

51 **Supplementary Figure 3**

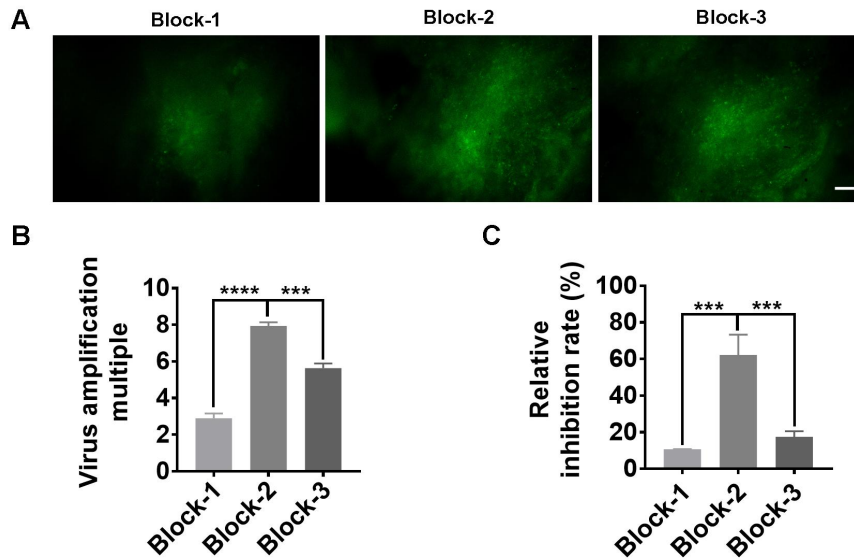

52

53 **Figure S3. Susceptibility of primary oral cancer tissues to OV-GFP.**

54 (A) Fluorescence images of 3 oral cancer tissue blocks that were infected with  
55 OV-GFP for 48 h (n=3). Scale bars, 200  $\mu$ m. (B) The replication of viruses in  
56 these cancer tissues was determined by using the titration assay (n=3). (C)  
57 The viability of tumor tissues was determined with the alamar blue assay (n=3).  
58 The relative inhibition rate was calculated by dividing the alamar blue dye  
59 signal at 48 h after OV-GFP treatment by the dye signal before the addition of  
60 OV-GFP. The statistical analysis was determined by one-way ANOVA, followed  
61 by Tukey's multiple comparison test analysis. All values are presented as the  
62 mean  $\pm$  SEM. \*\*\*p < 0.001, \*\*\*\*p < 0.0001.

63

64

65

66

67

68

69

70 **Supplementary Figure 4**

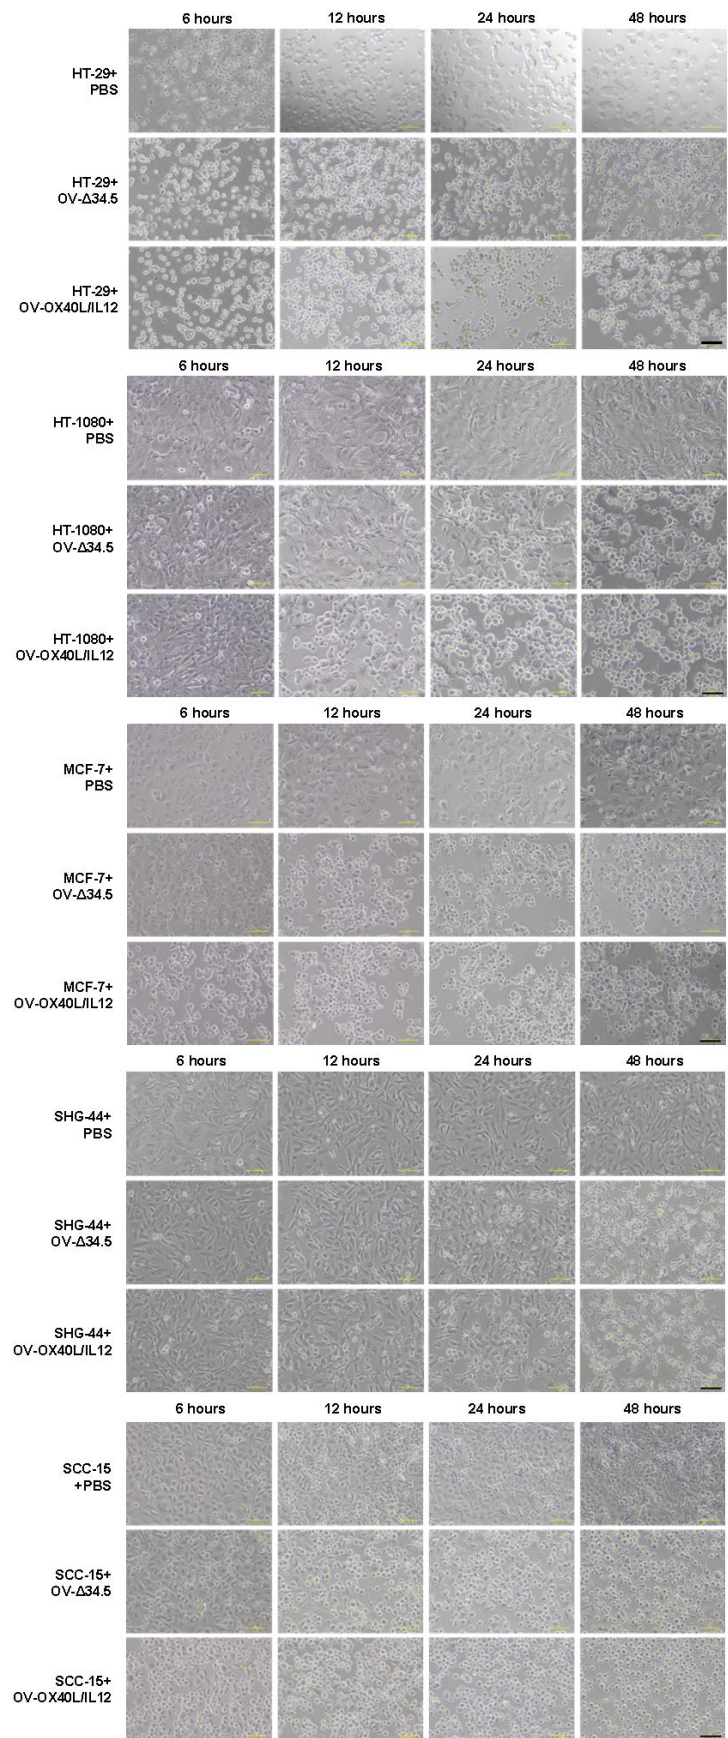

72 **Figure S4. Susceptibility of primary oral cancer tissues to OV-Δ34.5 and**

73 **OV-OX40L/IL12.**

74 SHG-44, SCC-15, MCF-7, HT-1080 and HT-29 cells were cultured with

75 OV-Δ34.5 or OV-OX40L/IL12 (MOI=0.01) for 6, 12, 24 and 48 h (n=3).

76 Representative images showing CPEs are shown. Scale bars, 200 μm.

77

78

79

80

81

82

83

84

85

86

87

88

89

90

91

92

93

94

95 **Supplementary Figure 5**

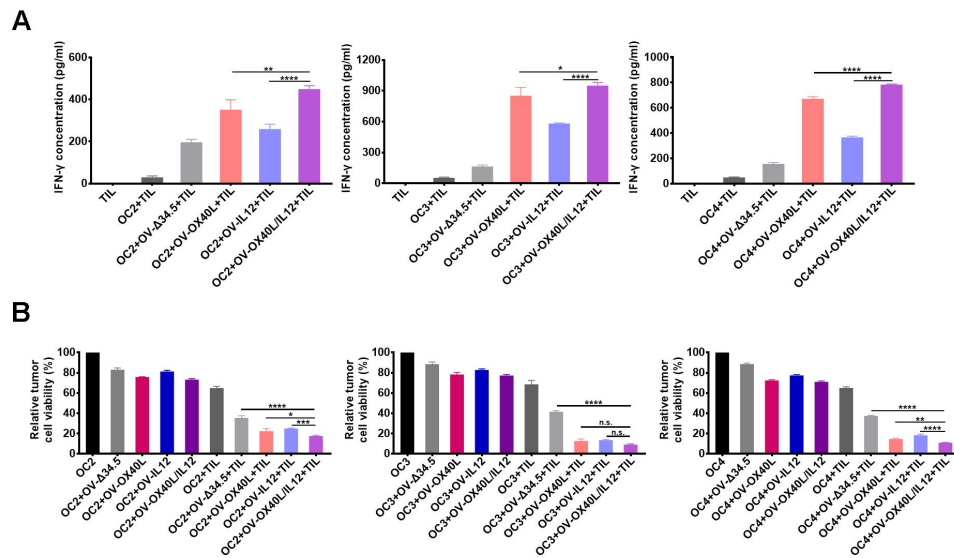

96

97 **Figure S5. TILs were activated by OV-OX40L/IL12-infected tumor cells**  
 98 **and exhibited enhanced tumoricidal activity.**

99 Oral cancer cells from 3 patients numbered OC2, OC3 and OC4 were infected  
 100 with the indicated OV and cocultured with TILs from the matched patients for  
 101 24 h. (A) IFN-γ levels in the culture supernatant were determined by using  
 102 ELISA (n=3). (B) The viability of the tumor cells in coculture was assessed by  
 103 using the MTT assay (n=3). Statistical significance was determined by using  
 104 one-way ANOVA followed by multiple comparison test. All values are  
 105 presented as the mean ± SEM. NS, not significant, \*p < 0.05, \*\*p < 0.01, \*\*\*p <  
 106 0.001 and \*\*\*\*p < 0.0001.

107

108

109

110

111

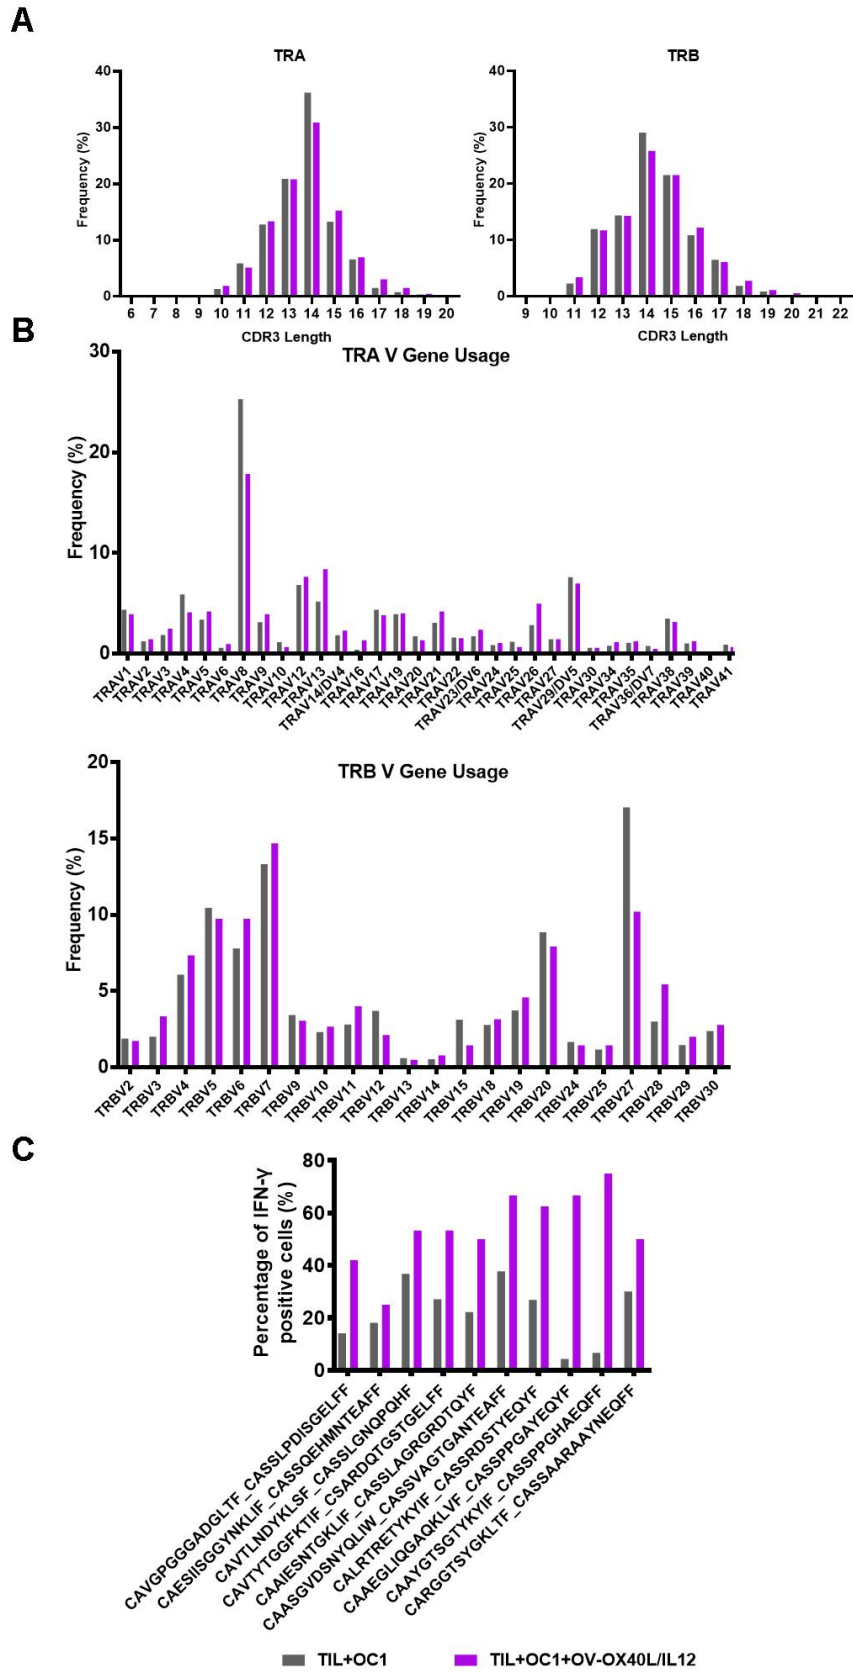



114 **Figure S6. The length distribution of CDR3 or TRAV and TRBV germline**  
115 **usage for TCRs of TILs in coculture.**

116 TILs were cocultured with mock-infected tumor cells or  
117 OV-OX40L/IL12-infected tumor cells. (A) The distribution of CDR3 length in  
118 both alpha and beta chains of TCRs. (B) TRAV and TRBV gene segment  
119 germline usage. (C) scTCR-seq and scRNA-seq were performed on TILs  
120 cocultured with OV-OX40L/IL12- or mock-infected tumor cells. The frequency  
121 of IFN- $\gamma$ -positive T cells is shown for the 10 most prevalent TCR clonotypes of  
122 TILs (n=3).

123

124

125

126

127

128

129

130

131

132

133

134

135

136 **Supplementary Figure 7**

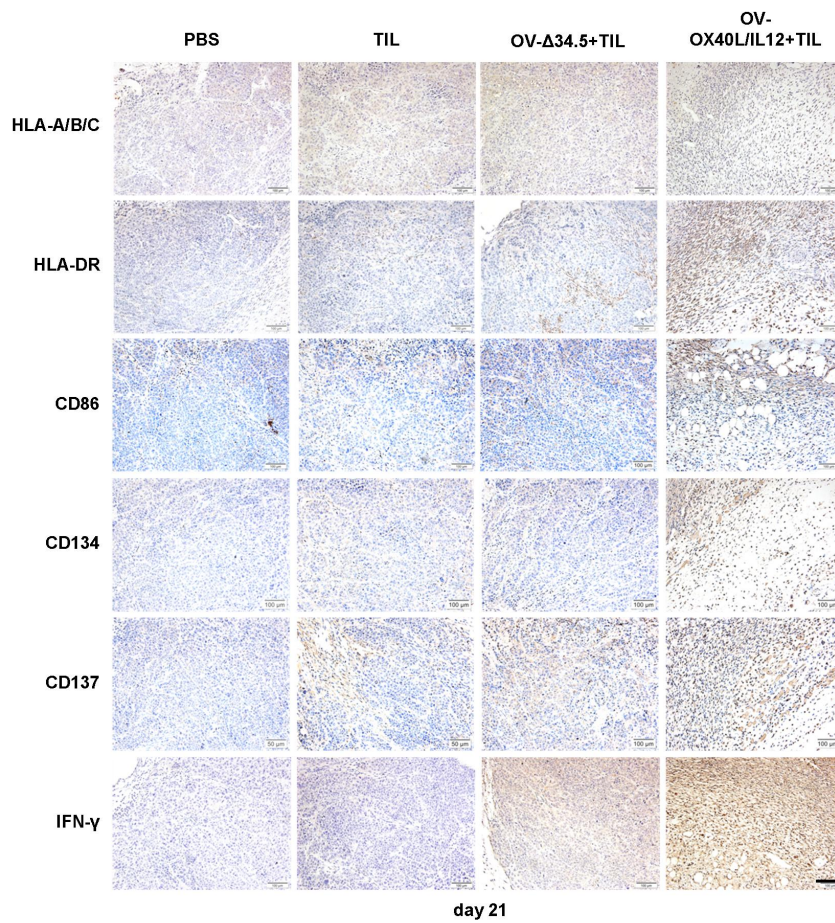

137

138 **Figure S7.** Representative images of IHC staining for HLA-ABC, HLA-DR,  
139 CD86, CD134, CD137 and IFN- $\gamma$  in tumor tissue sections 21 days after  
140 treatment of the OC1 PDX model (n=3). Scale bars, 100  $\mu$ m.

141

142

143

144

145

146

147

148 **Supplementary Figure 8**

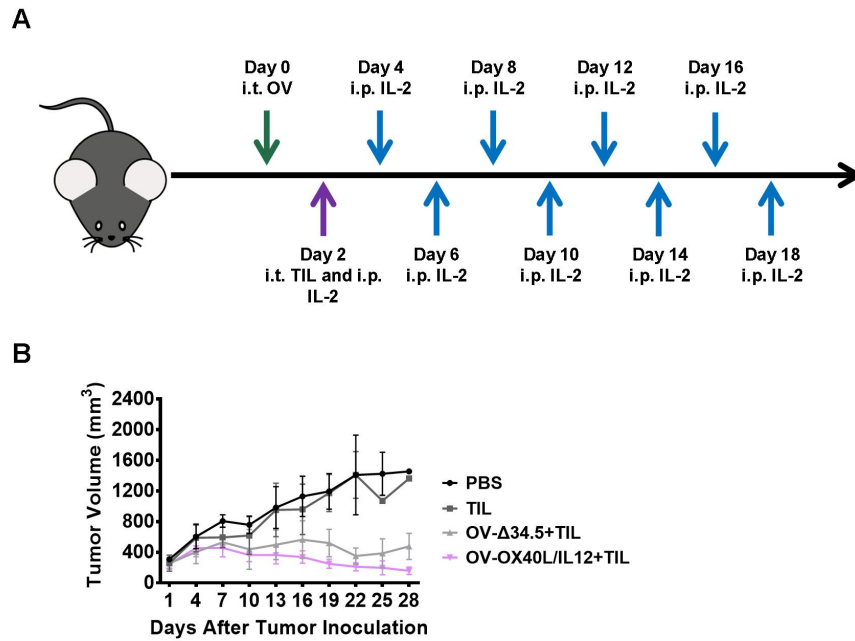

149  
150

151 **Figure S8. Antitumor efficacy of the combination therapy with**  
152 **OV-OX40L/IL12 and TILs in the 4th PDX tumor model (OC4 PDX model).**

153 (A) NSG mice were subcutaneously implanted with patient-derived tumor  
154 tissues, and the established tumors were intratumorally injected with the  
155 indicated OV followed by an intratumor injection of *ex vivo* expanded TILs from  
156 the same patient numbered OC4 (n=4). Tumor growth was measured every  
157 other day. The average tumor volumes (B) are shown.

158  
159  
160  
161  
162  
163  
164  
165  
166  
167  
168

169 **Supplementary Figure 9**

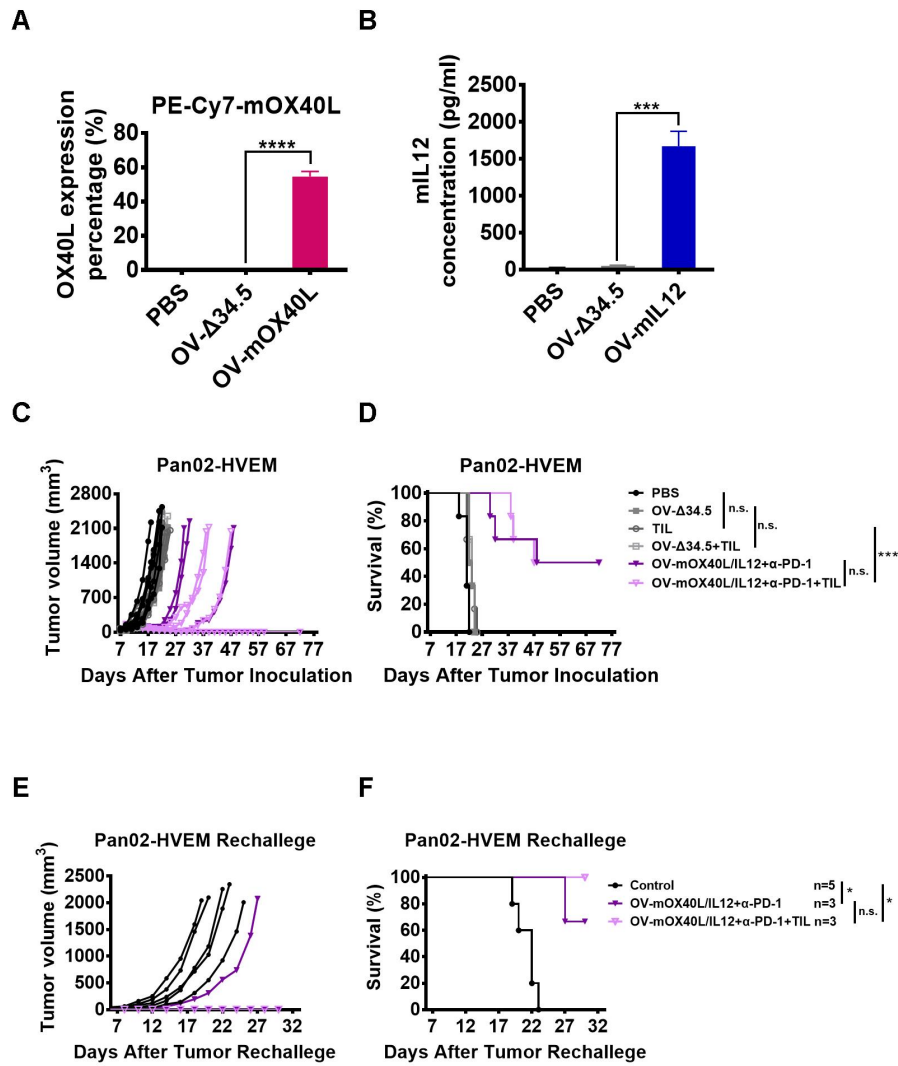

170

171

172

173

174

175

176

177

178 **Figure S9. Combination therapy with OV-mOX40L/IL12 and TILs led to**  
179 **marked tumor regression in immunocompetent murine tumor models.**

180 (A) The expression of functional mOX40L by the infected MC38 tumor cells  
181 was analyzed (n=3) by using flow cytometry. (B) Secretion of mIL12 from the  
182 infected MC38 cells was detected by using ELISA (n=3). The statistical  
183 analysis was determined by one-way ANOVA, followed by Tukey's multiple  
184 comparison test analysis. \*\*\*p < 0.001, \*\*\*\*p < 0.0001. (C) Tumor growth was  
185 monitored over time using electric calipers to measure tumor size in two  
186 dimensions (n=6). (D) The survival curve of Pan02-HVEM tumor-bearing mice  
187 was plotted using Kaplan-Meier analysis, and the log-rank test indicated a  
188 significant difference in the survival curves between the OV-mOX40L/IL12,  
189 PD-1 antagonist antibody and TIL combination therapy groups and the  
190 OV-Δ34.5+TIL group (n=6). Mice previously cured of Pan02-HVEM tumors by  
191 the combination therapy and age-matched treatment-naïve mice were  
192 subcutaneously inoculated with Pan02-HVEM cells. Tumor growth (E) in  
193 individual mice and the survival curve (F) are shown. All values are presented  
194 as the mean ± SEM. NS, not significant, \*p < 0.05 and \*\*\*p < 0.001.

195  
196  
197  
198  
199  
200  
201  
202  
203  
204

**A**

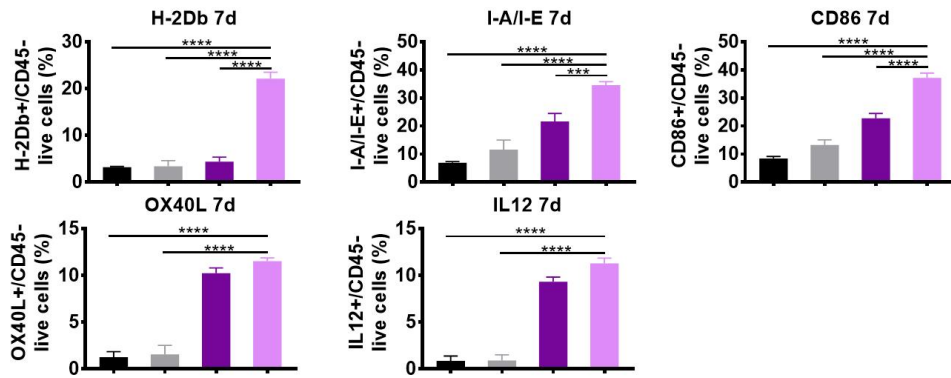

**B**

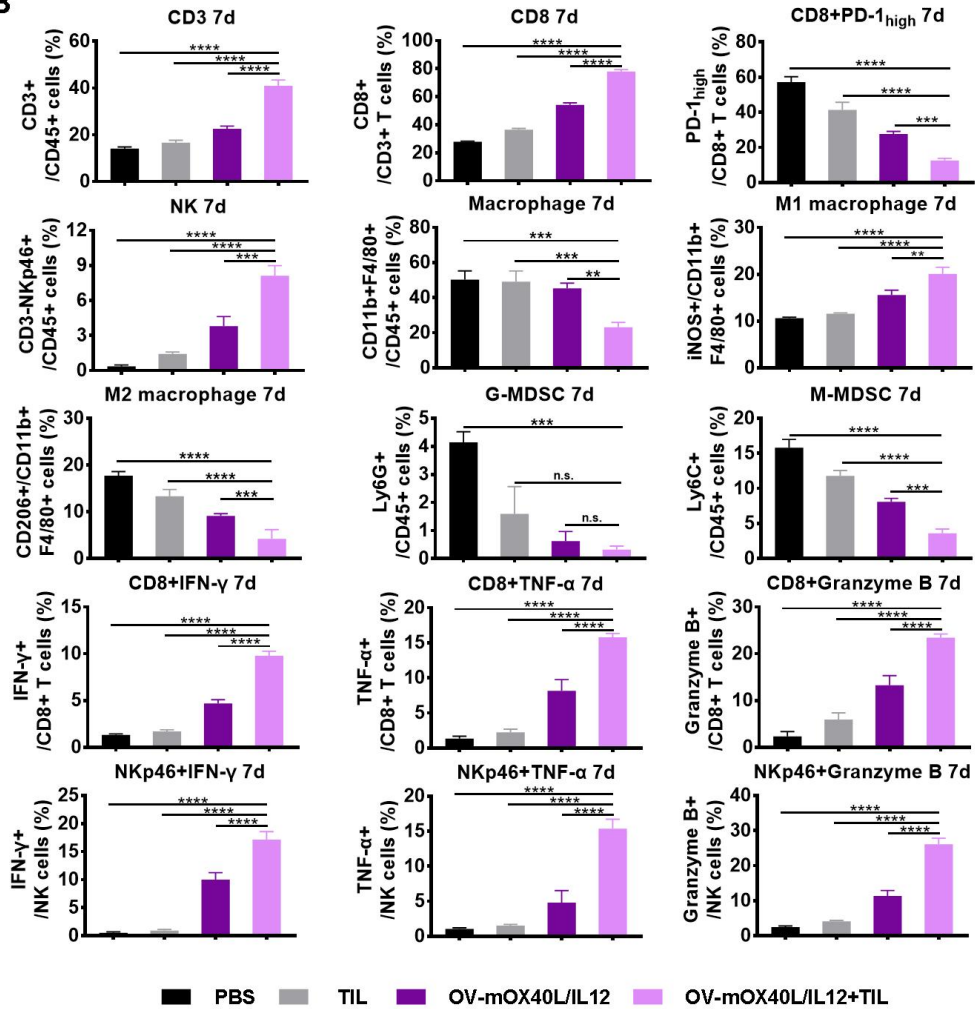

■ PBS    ■ TIL    ■ OV-mOX40L/IL12    ■ OV-mOX40L/IL12+TIL

C

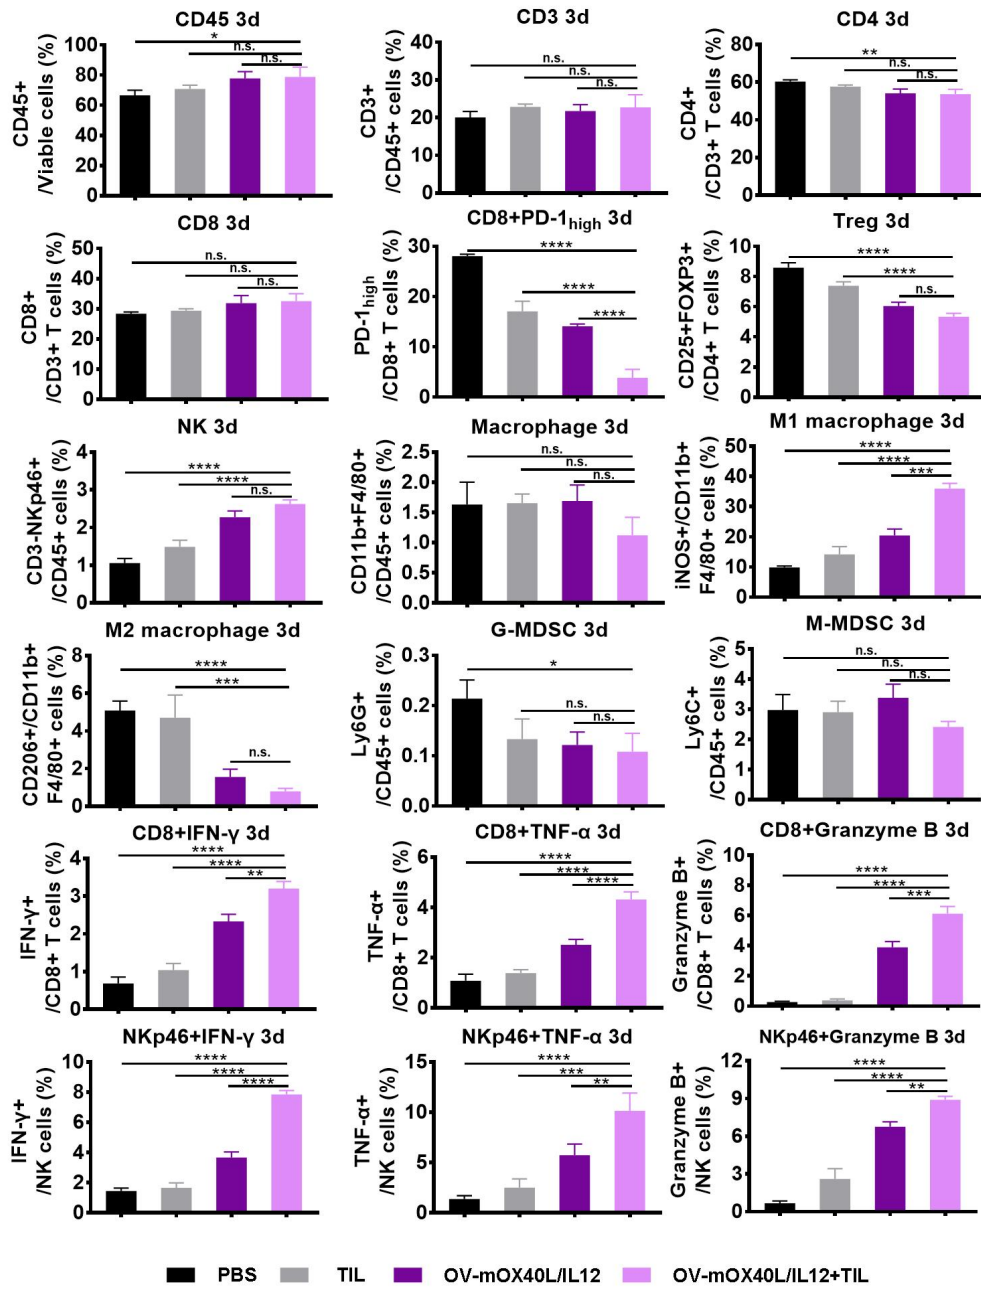

207

D

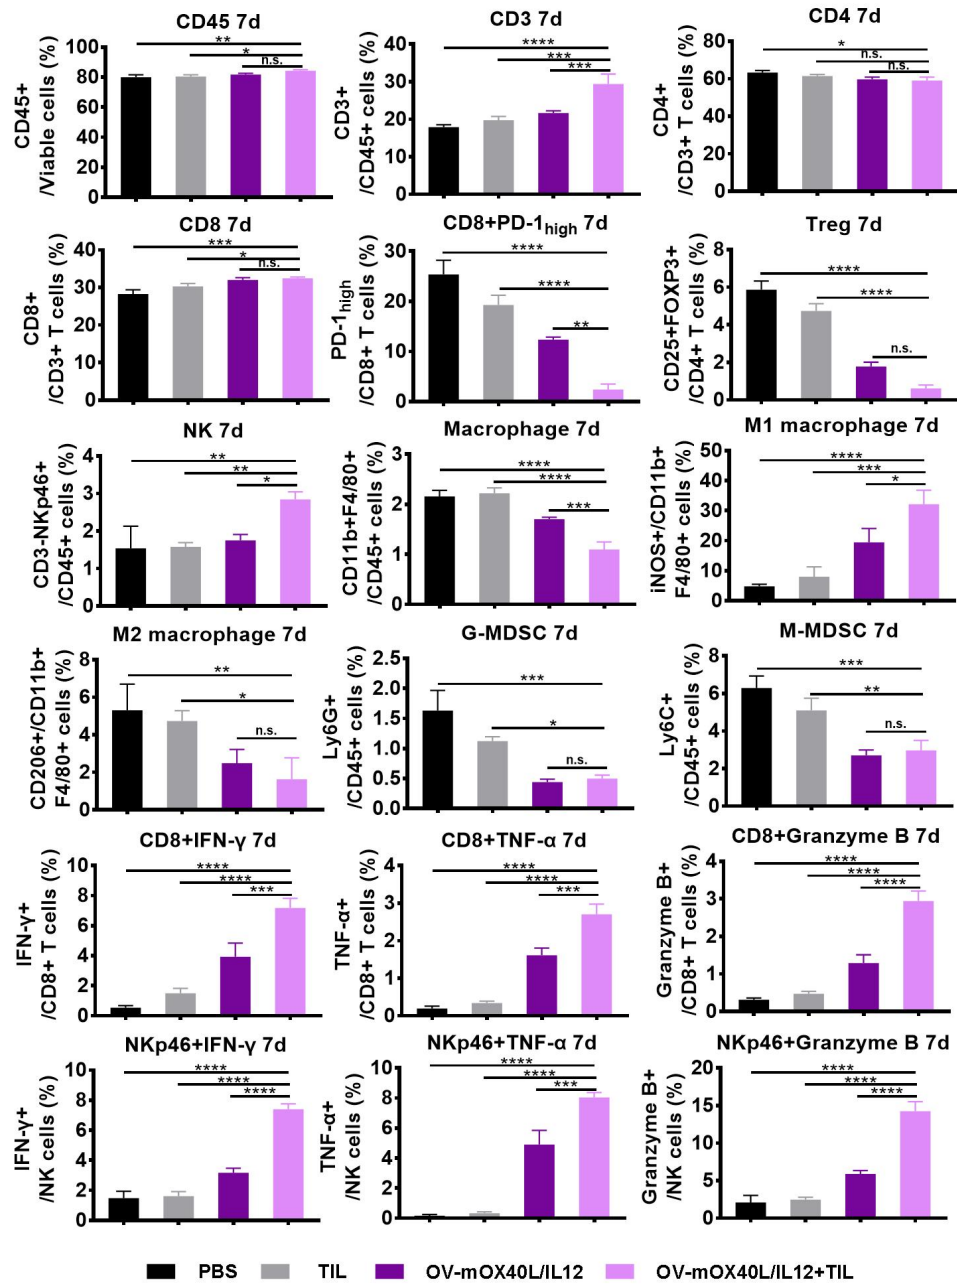

208



**E**

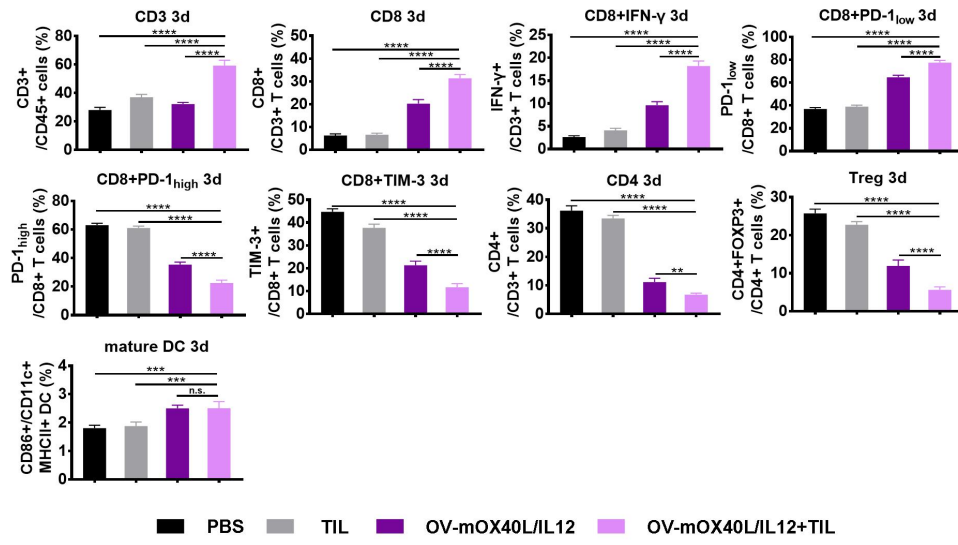

209

210

211

212

213

214

215

216

217

218

219

220

221

222

223

224 **Supplementary Figure 10. Analysis of tumors, tdLNs and splenocytes**  
225 **after MC38-tumor-bearing mice were treated with the OV and TILs.**

226 Mice were subcutaneously implanted with MC38 cells and treated as indicated  
227 (n=3). A single-cell suspension was prepared from tumor tissue 7 days after  
228 treatment. Tumor cells (A) and tumor infiltrating immune cells (B) were stained  
229 and subjected to flow cytometry analysis of the expression of APC-related  
230 molecules (A) and profiling of different types of immune cells and their  
231 activation status (B). A single-cell suspension was prepared from spleen tissue  
232 3 days (C) and 7 days (D) after treatment. Splenocytes were stained and  
233 subjected to a flow cytometry analysis. (E) Flow cytometry analysis of  
234 endogenous DCs and multiple immune cell phenotypes in the tdLNs. The  
235 statistical analysis was determined by one-way ANOVA, followed by  
236 Tukey's multiple comparison test analysis. All values are presented as the  
237 mean  $\pm$  SEM. NS, not significant, \*p < 0.05, \*\*p < 0.01, \*\*\*p < 0.001 and \*\*\*\*p <  
238 0.0001.

239

240

241

242

243

244

245

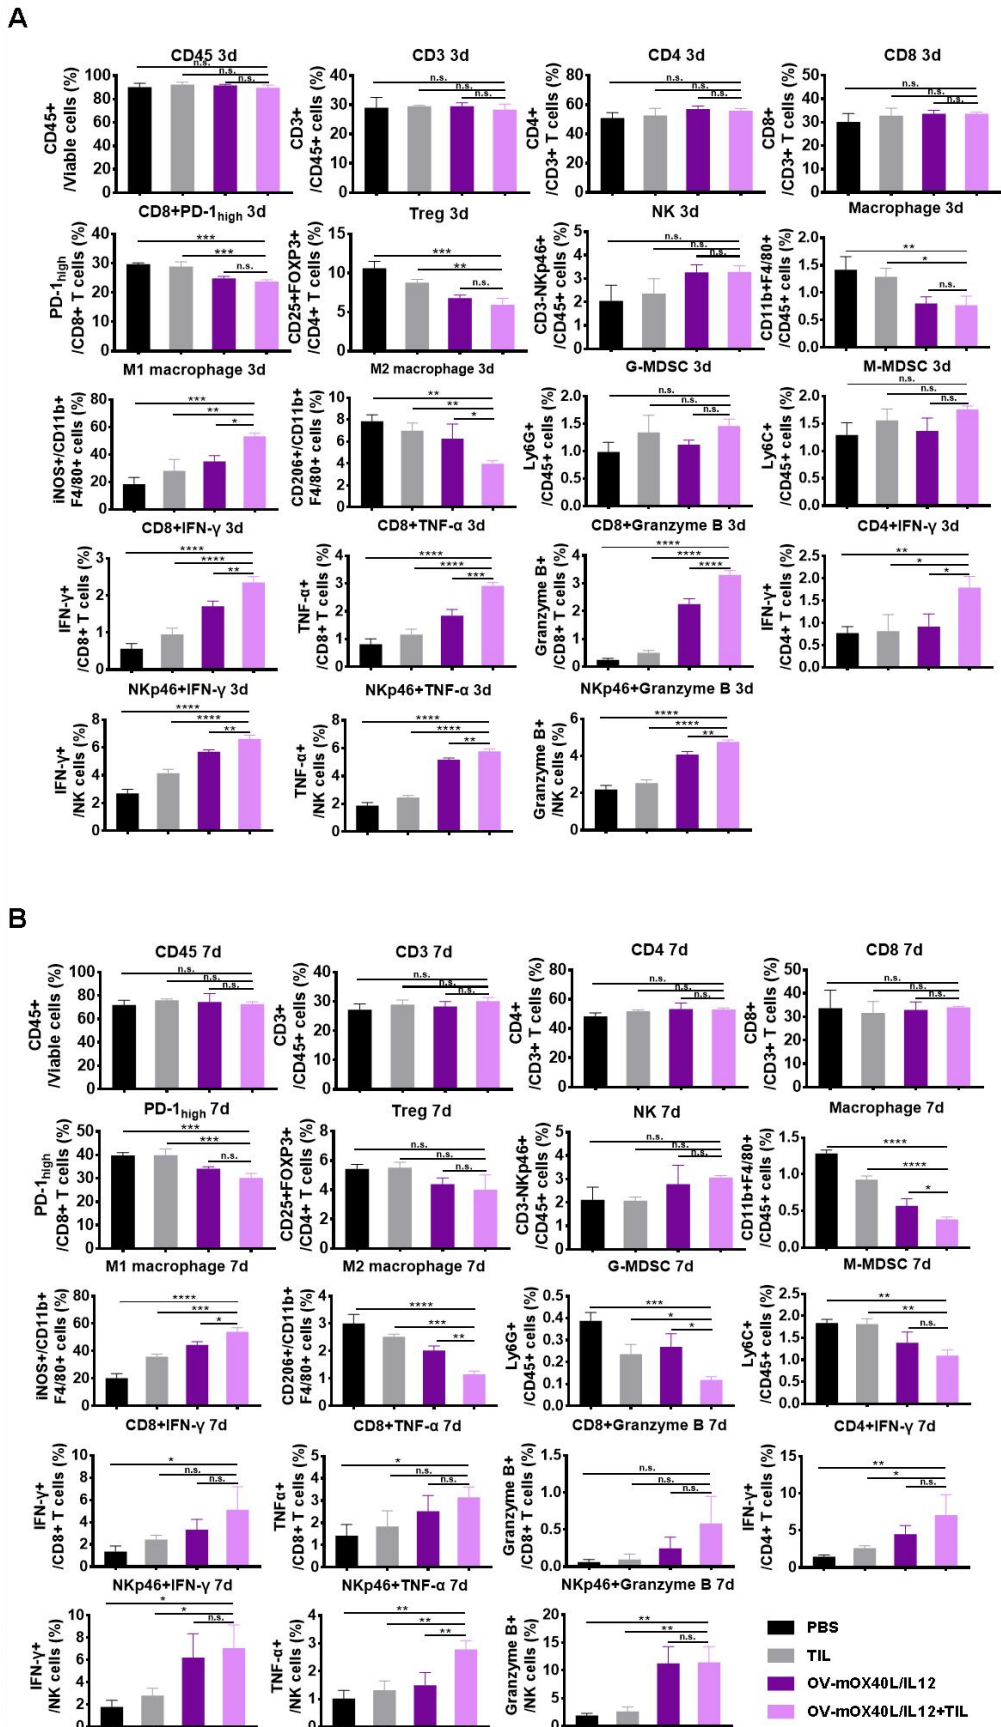

C

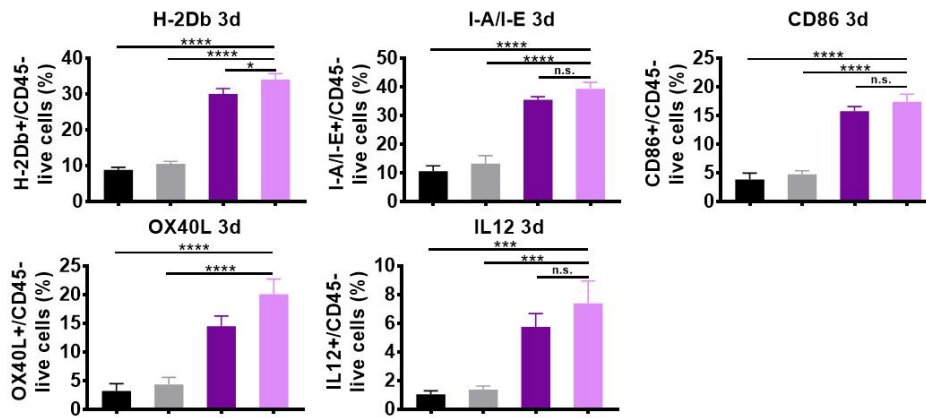

D

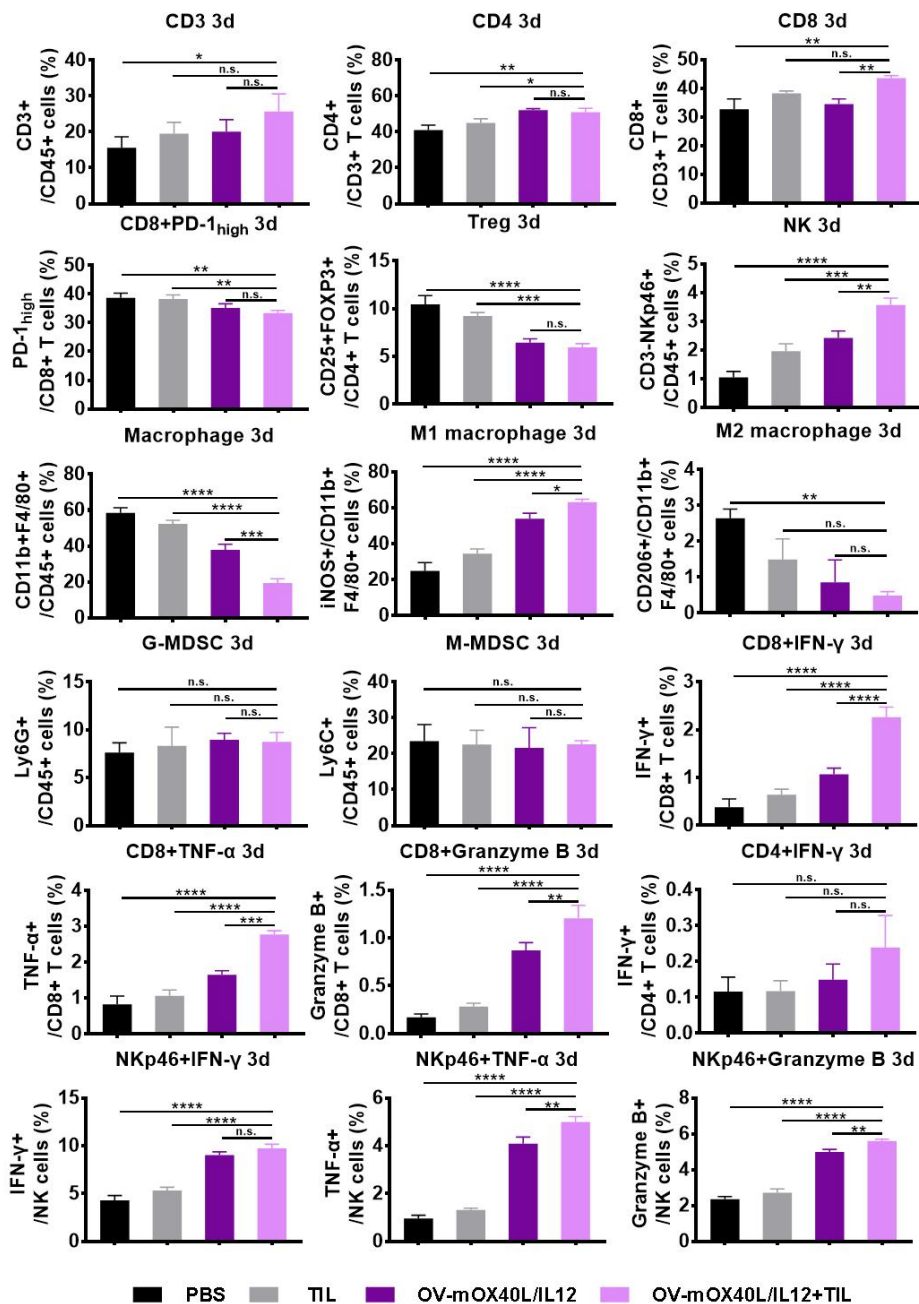

**E**

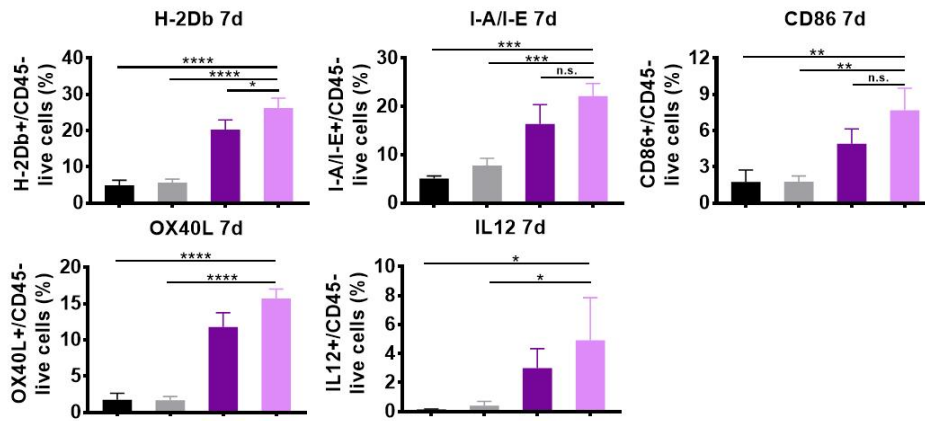

**F**

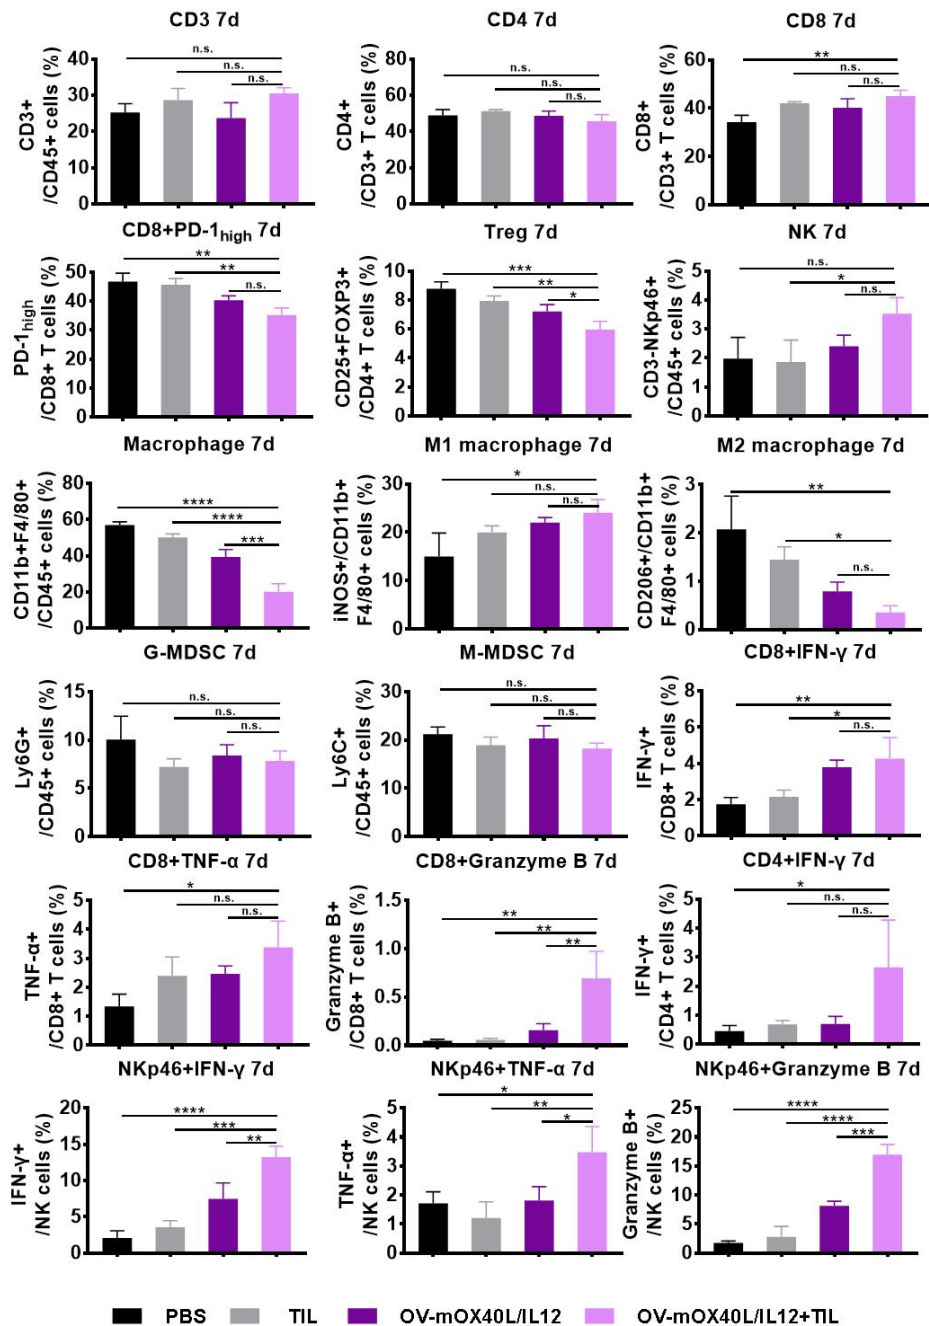

250 **Figure S11. Analysis of tumors and splenocytes after Pan02-HVEM**  
251 **tumor-bearing mice were treated with the OV and TILs.**

252 Mice were subcutaneously implanted with Pan02-HVEM cells and treated as  
253 indicated (n=3). A single-cell suspension was prepared from the spleen tissue  
254 3 days (A) and 7 days (B) after treatment. Splenocytes were stained and  
255 subjected to a flow cytometry analysis. A single-cell suspension was prepared  
256 from tumor tissues 3 days (C, D) and 7 days (E, F) after treatment. Tumor cells  
257 (C, E) and tumor-infiltrating mononuclear cells (D, F) were stained and  
258 subjected to a flow cytometry analysis to determine the expression of  
259 APC-related molecules (C, E), and the profiles of different types of immune  
260 cells and their activation status are presented (D, F). The statistical analysis  
261 was determined by one-way ANOVA, followed by Tukey's multiple  
262 comparison test analysis. All values are presented as the mean  $\pm$  SEM. NS,  
263 not significant, \*p < 0.05, \*\*p < 0.01, \*\*\*p < 0.001 and \*\*\*\*p < 0.0001.

264  
265  
266  
267  
268  
269  
270  
271  
272  
273  
274  
275  
276  
277  
278  
279

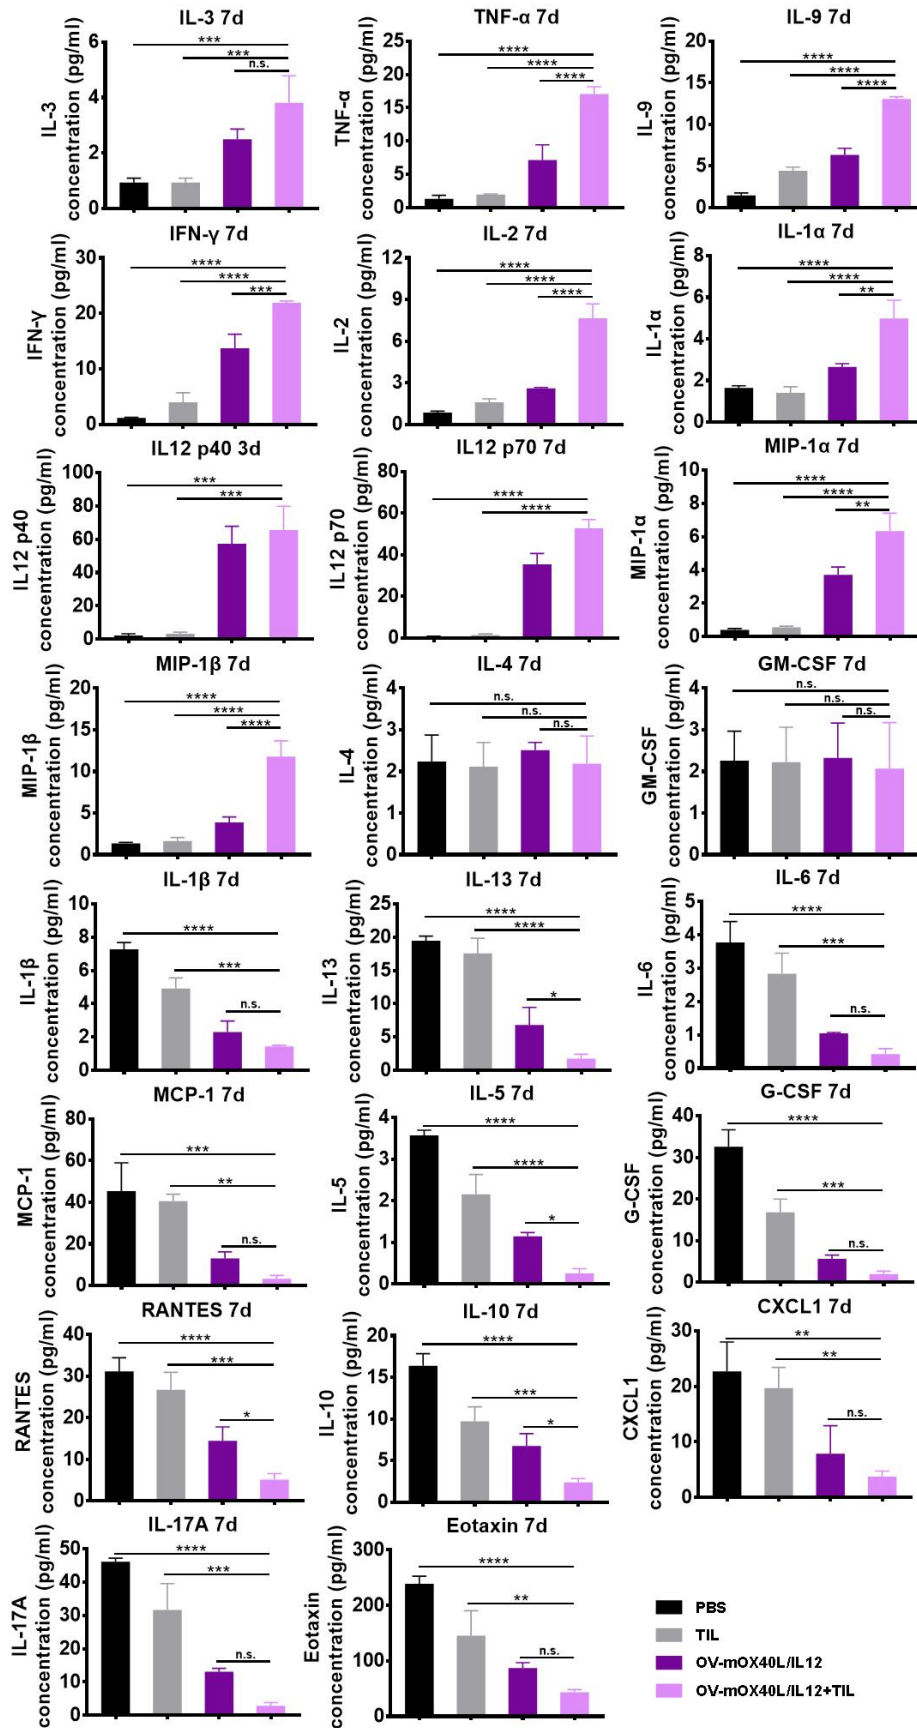

282 **Figure S12. Profiles of cytokines and chemokines in serum samples from**  
283 **treated mice.**

284 Mice were subcutaneously implanted with MC38 cells and treated as indicated  
285 (n=3). Cytokine concentrations in serum collected 7 days after treatment were  
286 determined using a Bio-Plex Mouse Cytokine 23-Plex Array. The statistical  
287 analysis was determined by one-way ANOVA, followed by Tukey's multiple  
288 comparison test analysis. All values are presented as the mean  $\pm$  SEM. NS,  
289 not significant, \*p < 0.05, \*\*p < 0.01, \*\*\*p < 0.001 and \*\*\*\*p < 0.0001.

290  
291  
292  
293  
294  
295  
296  
297  
298  
299  
300  
301  
302  
303  
304  
305  
306  
307  
308  
309  
310  
311  
312  
313  
314  
315  
316  
317



318 **Supplementary Figure 13**

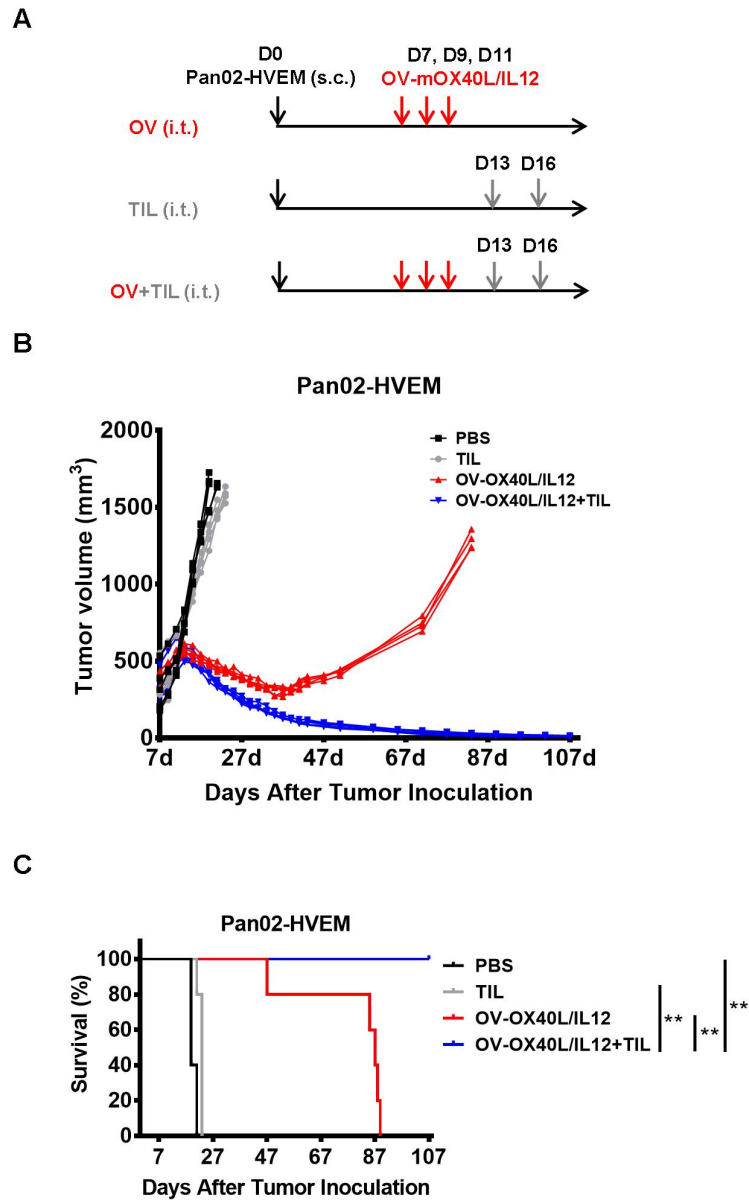

319

320

321

322

323

324

325 **Figure S13. Tumor growth and survival of Pan02-HVEM tumor-bearing**  
326 **mice after treatment.**

327 (A) Schematic of C57BL/6J mice with subcutaneous Pan02-HVEM tumors  
328 treated with OV-mOX40L/IL12 and TILs. (B) Mice were subcutaneously  
329 injected with Pan02-HVEM cells ( $1 \times 10^6$  cells) on day 0. On days 7, 9 and 11,  
330 mice were intratumorally treated with 0 or three doses of  $2 \times 10^6$  PFUs of  
331 OV-mOX40L/IL12 per mouse. On days 13 and 16, the mice were administered  
332 intratumoral injections of two doses of TILs ( $1 \times 10^6$  cells). The tumor volume  
333 was measured with calipers. Data for each mouse ( $n = 5$  mice per group) are  
334 shown. (C) Kaplan–Meier survival curves for the experiment described in (A).  
335 The  $p$  value indicates the difference between OV-mOX40L/IL12 and  
336 OV-mOX40L/IL12+TIL, as determined by using the log rank (Mantel–Cox) test.  
337 \*\* $p < 0.01$ .

338

339

340

341

342

343

344

345

346

347 **Supplementary Figure 14**

**A**

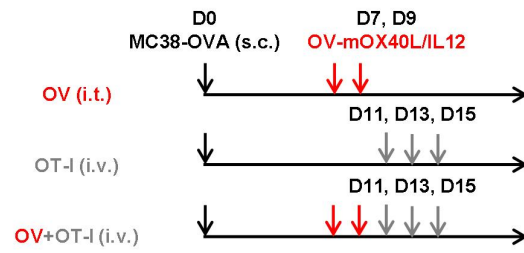

**B**

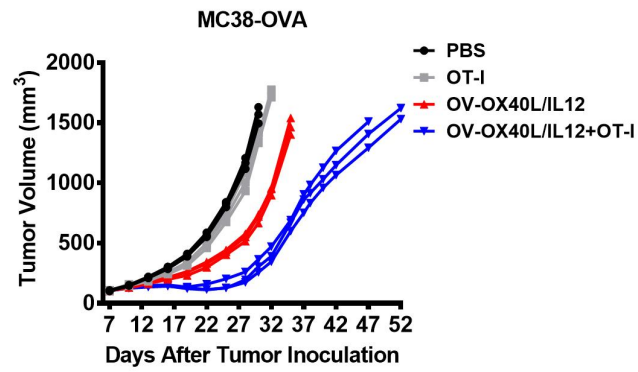

**C**

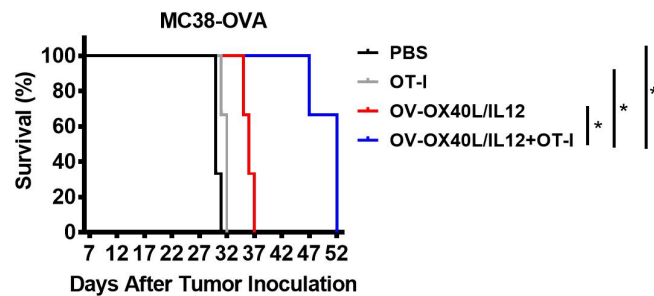

348

349

350

351

352

353

354 **Figure S14. The antitumor effect of intratumoral administration of**  
355 **OV-OX40L/IL12 plus systemic administration of TILs.**

356 (A) Schematic of C57BL/6J mice with subcutaneous MC38-OVA tumors  
357 treated with OV-mOX40L/IL12 and OT-I T cells. Mice were injected  
358 subcutaneously with MC38-OVA cells on day 0. On days 7 and 9, mice were  
359 subcutaneously sham injected or were injected with  $2 \times 10^6$  PFUs of  
360 OV-mOX40L/IL12 per mouse. On days 11, 13 and 15, the mice were injected  
361 with PBS or OT-I T cells ( $1 \times 10^7$  cells) via the tail vein.  $n = 3$  mice per group.  
362 (B) Growth of transplanted tumors in the MC38-OVA model ( $n = 3$ ). (C)  
363 Kaplan–Meier survival curves for the experiment described in (A). The mean  $\pm$   
364 SEM are shown. The  $p$  value indicates the difference between  
365 OV-mOX40L/IL12 and OV-mOX40L/IL12+OT-I, as determined by using the log  
366 rank (Mantel–Cox) test.  $*p < 0.05$ .

367  
368  
369  
370  
371  
372  
373  
374  
375  
376  
377  
378  
379  
380  
381  
382  
383  
384

385 **Supplementary Figure 15**

**A**

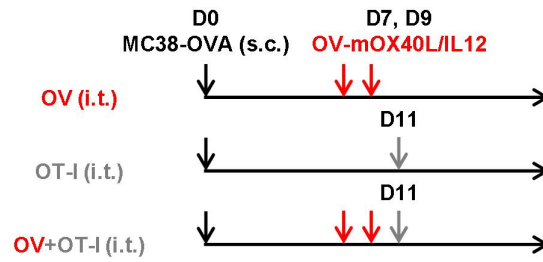

**B**

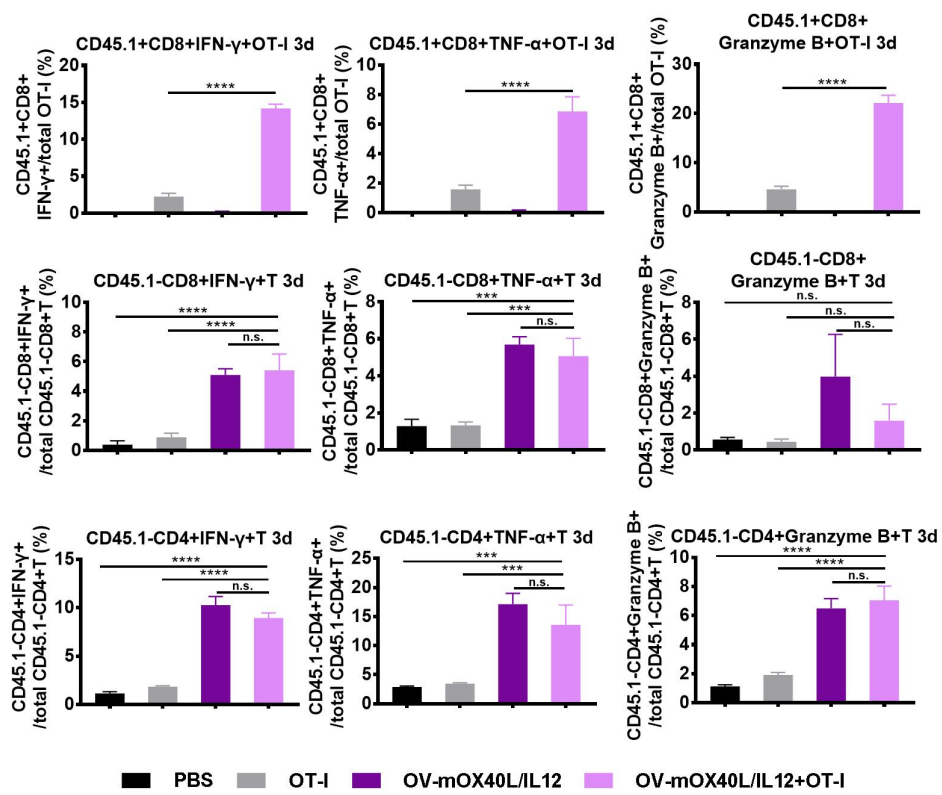

386

387

388

389

390

391

392

393 **Figure S15. Effect of OV-mOX40L/IL12 on the activation of adoptively**  
394 **transferred and endogenous T cells.**

395 (A) Schematic of C57BL/6J mice subcutaneous MC38-OVA tumors treated  
396 with OV-mOX40L/IL12 and OT-I T cells. (B) A single-cell suspension was  
397 prepared from tumor tissues 3 days after treatment. TILs were stained and  
398 subjected to a flow cytometry analysis to profile different types of immune cells  
399 and their activation status. The statistical analysis was determined by one-way  
400 ANOVA, followed by Tukey's multiple comparison test analysis. All values are  
401 presented as the mean  $\pm$  SEM. NS, not significant, \* $p < 0.05$ , \*\* $p < 0.01$ , \*\*\* $p <$   
402  $0.001$  and \*\*\*\* $p < 0.0001$ .

403  
404  
405  
406  
407  
408  
409  
410  
411  
412  
413  
414  
415  
416  
417  
418  
419  
420  
421  
422  
423  
424  
425  
426

427 **Supplementary Tables**

428

429 **Table S1. List of anti-human antibodies**

430

| Item                                             | Vendor          | Catalog number |
|--------------------------------------------------|-----------------|----------------|
| PE anti-human CD252 (OX40L) Antibody             | Biolegend       | 326307         |
| PE/Dazzle™ 594 anti-human HLA-A, B, C Antibody   | Biolegend       | 311439         |
| FITC anti-human HLA-DR, DP, DQ Antibody          | Biolegend       | 361705         |
| PE anti-human CD80 Antibody                      | Biolegend       | 305207         |
| FITC anti-human CD86 Antibody                    | Biolegend       | 374203         |
| PE/Dazzle™ 594 anti-human CD274 (PD-L1) Antibody | Biolegend       | 329731         |
| PE anti-human CD197 (CCR7) Antibody              | Biolegend       | 353203         |
| FITC anti-human CD45RA Antibody                  | Biolegend       | 304106         |
| Anti-HLA-DR Antibody, Rabbit Polyclonal          | Sino Biological | 100586-T08     |
| Anti-HLA A, B, C Antibody, Rabbit Polyclonal     | Bioss           | bs-10634R      |
| Anti-CD86 Antibody, Rabbit Polyclonal            | Bioss           | bs-1035R       |
| Anti-IFN gamma Antibody, Rabbit Polyclonal       | Bioss           | bs-0481R       |
| Anti-CD137 Antibody, Rabbit Polyclonal           | Bioss           | bs-2449R       |
| Anti-CD134 Antibody, Rabbit Polyclonal           | Bioss           | bs-2685R       |

431

432

433

434

435

436

437

438

439

440

441

442

443

444

445

446

447

448

449

450

451

452

453  
454

**Table S2. List of anti-mouse antibodies**

| Item                                                   | Vendor            | Catalog number |
|--------------------------------------------------------|-------------------|----------------|
| FITC anti-mouse CD45 Antibody                          | Biolegend         | 103108         |
| PerCP/Cyanine5.5 anti-mouse CD3ε Antibody              | Biolegend         | 100328         |
| Pacific Blue™ anti-mouse CD4 Antibody                  | Biolegend         | 100428         |
| Brilliant Violet 510™ anti-mouse CD8a Antibody         | Biolegend         | 100752         |
| Brilliant Violet 605™ anti-mouse CD25 Antibody         | Biolegend         | 102036         |
| PE/Cyanine7 anti-mouse CD335 (NKp46) Antibody          | Biolegend         | 137618         |
| PE/Dazzle™ 594 anti-mouse CD279 (PD-1) Antibody        | Biolegend         | 135228         |
| Alexa Fluor® 647 anti-mouse/rat/human FOXP3 Antibody   | Biolegend         | 320014         |
| PE anti-mouse/human Ki-67 Antibody                     | Biolegend         | 151210         |
| PerCP/Cyanine5.5 anti-mouse CD19 Antibody              | Biolegend         | 152406         |
| Pacific Blue™ anti-mouse/human CD11b Antibody          | Biolegend         | 101224         |
| Brilliant Violet 510™ anti-mouse Ly-6C Antibody        | Biolegend         | 128033         |
| Brilliant Violet 605™ anti-mouse Ly-6G Antibody        | Biolegend         | 127639         |
| PE/Cyanine7 anti-mouse F4/80 Antibody                  | Biolegend         | 123114         |
| PE/Dazzle™ 594 anti-mouse CD206 (MMR) Antibody         | Biolegend         | 141732         |
| APC anti-mouse I-A/I-E Antibody                        | Biolegend         | 107613         |
| PE anti-mouse NOS2 (iNOS) Antibody                     | Thermo Scientific | 12-5920-82     |
| Brilliant Violet 605™ anti-mouse TNF-α Antibody        | Biolegend         | 506329         |
| PE/Dazzle™ 594 anti-mouse IFN-γ Antibody               | Biolegend         | 505846         |
| PE anti-human/mouse granzyme B recombinant Antibody    | Biolegend         | 372208         |
| Pacific Blue™ anti-mouse CD45 Antibody                 | Biolegend         | 157211         |
| PE/Cyanine7 anti-mouse CD252 (OX40L) Antibody          | Biolegend         | 108813         |
| PerCP/Cyanine5.5 anti-mouse IL12/IL23 p40 Antibody     | Biolegend         | 505211         |
| PE/Dazzle™ 594 anti-mouse CD86 Antibody                | Biolegend         | 105041         |
| FITC anti-mouse H-2D <sup>b</sup> Antibody             | Biolegend         | 111505         |
| Brilliant Violet 605™ anti-mouse CD279 (PD-1) Antibody | Biolegend         | 135220         |
| PE anti-mouse CD366 (Tim-3) Antibody                   | Biolegend         | 134003         |
| PerCP/Cyanine5.5 anti-mouse/human CD45R/B220 Antibody  | Biolegend         | 103235         |
| PerCP/Cyanine5.5 anti-mouse NK-1.1 Antibody            | Biolegend         | 108727         |
| Brilliant Violet 510™ anti-mouse CD11c Antibody        | Biolegend         | 117337         |
| PE/Cyanine7 anti-mouse CD45.1 Antibody                 | Biolegend         | 110729         |
| APC anti-mouse/human CD44 Antibody                     | Biolegend         | 103012         |
| FITC anti-mouse CD62L Antibody                         | Biolegend         | 104406         |

455  
456



457

458 1. Zhang, H., Sturchler, E., Zhu, J., Nieto, A., Cistrone, P.A., Xie, J., He, L., Yea, K., Jones, T., Turn,  
459 R., et al. (2015). Autocrine selection of a GLP-1R G-protein biased agonist with potent  
460 antidiabetic effects. *Nat. Commun.* 6, 8918.

461
